# Supplementary material
Source: Royal Society of Chemistry journal article supplement (doi:10.1039/d6qi00690f)
Supplement: d6qi00690f1.pdf [file d6qi00690f1.pdf]

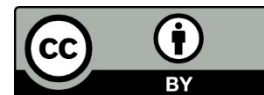

**Supporting Information for**

**Electrochemical Generation of an Open-Shell Gold(III)–Dithiolene Porous  
Coordination Polymer**

Yohan Cheret,<sup>1</sup> Ghenadie Novitchi,<sup>2</sup> Kaoutar Benjelloun,<sup>1</sup> Pascale Auban-Senzier,<sup>3</sup> Pere Alemany,<sup>4</sup>  
Enric Canadell,<sup>\*,5</sup> Narcis Avarvari,<sup>\*,1</sup> Nicolas Zigon<sup>\*,1</sup>

<sup>1</sup> Univ Angers, CNRS, MOLTECH-ANJOU, SFR MATRIX, F-49000 Angers, France. E-mail:  
[narcis.avarvari@univ-angers.fr](mailto:narcis.avarvari@univ-angers.fr) ; [nicolas.zigon@univ-angers.fr](mailto:nicolas.zigon@univ-angers.fr)

<sup>2</sup>Laboratoire National des Champs Magnétiques Intenses, Université de Grenoble Alpes, INSA  
Toulouse, Université de Toulouse Paul Sabatier, EMFL, CNRS, 25 avenue des Martyrs, 38042  
Grenoble, France

<sup>3</sup> Université Paris-Saclay, CNRS, UMR 8502, Laboratoire de Physique des Solides, 91405 Orsay,  
France

<sup>4</sup> Departament de Ciència de Materials i Química Física and Institut de Química Teòrica i  
Computacional (IQTCUB), Universitat de Barcelona, Martí i Franquès 1, 08028 Barcelona, Spain

<sup>5</sup> Institut de Ciència de Materials de Barcelona, ICMAB-CSIC, Campus de la UAB, 08193 Bellaterra,  
Spain, and Royal Academy of Sciences and Arts of Barcelona, Chemistry Section, La Rambla 115,  
08002 Barcelona, Spain. E-mail: [canadell@icmab.es](mailto:canadell@icmab.es)

## Summary

|                                |   |
|--------------------------------|---|
| <b>Experimental Part</b> ..... | 3 |
|--------------------------------|---|

### Tables

|                                                                                                               |   |
|---------------------------------------------------------------------------------------------------------------|---|
| <b>Table S 1.</b> Crystallographic data, details of data collection and structure refinement parameters. .... | 6 |
| <b>Table S 2.</b> Selected bond lengths for <b>1-Bu<sub>4</sub></b> . ....                                    | 7 |
| <b>Table S 3.</b> Selected bond lengths for <b>1-H<sub>3</sub>(TBA)<sub>2</sub></b> . ....                    | 7 |
| <b>Table S 4.</b> Selected bond lengths for <b>1-Cd<sub>2</sub></b> . ....                                    | 8 |

### Schemes

|                                                                                                                                                                                                                |   |
|----------------------------------------------------------------------------------------------------------------------------------------------------------------------------------------------------------------|---|
| <b>Scheme S 1.</b> Synthetic trials to obtain the target neutral Au-dithiolene complexes <b>1-H<sub>4</sub></b> . i) I <sub>2</sub> , CH <sub>2</sub> Cl <sub>2</sub> , ii) TBAOH, THF, H <sub>2</sub> O. .... | 4 |
|----------------------------------------------------------------------------------------------------------------------------------------------------------------------------------------------------------------|---|

### Figures

|                                                                                                                                                                                                                                                                                                                                                                                                |    |
|------------------------------------------------------------------------------------------------------------------------------------------------------------------------------------------------------------------------------------------------------------------------------------------------------------------------------------------------------------------------------------------------|----|
| <b>Figure S 1.</b> Cyclic Voltammogram for <b>1-Bu<sub>4</sub><sup>-</sup>;TBA<sup>+</sup></b> (DCM, C = 1·10 <sup>-3</sup> mol.L <sup>-1</sup> , TBAPF <sub>6</sub> 0.1 M, Ar, WE and CE = Pt, RE = Ag <sup>+</sup> /Ag). ....                                                                                                                                                                | 4  |
| <b>Figure S 2.</b> Experimental magnetic data for <b>1-Cd<sub>2</sub></b> (black circles) together with the best-fit curves (red lines) for the temperature dependence of $\chi$ , $\chi T$ , and $1/\chi$ . The blue line represents the contribution of the polymeric 1D chain, while the green line corresponds to the Curie-type contribution from isolated S = 1/2 spins with g=2.0. .... | 5  |
| <b>Figure S 3.</b> Set-up used for the electrocrystallization of <b>1-Cd<sub>2</sub></b> . ....                                                                                                                                                                                                                                                                                                | 8  |
| <b>Figure S 4.</b> Microscope picture of the crystals obtained from the solvothermal electrocrystallization of <b>1-Cd<sub>2</sub></b> (red arrows : crystalline dark needles of <b>1-Cd<sub>2</sub></b> : red arrows ; yellow <b>1-Cd<sub>2</sub>(TBA)</b> : green arrows). ....                                                                                                              | 9  |
| <b>Figure S 5.</b> Powder X-Ray Diffractogram of <b>1-Cd<sub>2</sub></b> (red : simulated ; black : experimental). ....                                                                                                                                                                                                                                                                        | 9  |
| <b>Figure S 6.</b> TGA of <b>1-Cd<sub>2</sub></b> (Argon flow, 10 K/min scan-rate). The loss of the solvent (DMF, EtOH, acetone or water) is observed until 330°C. The material is degraded above 350°C. At 900°C, the remaining mass corresponds to the inorganic parts. ....                                                                                                                 | 10 |
| <b>Figure S 7.</b> <sup>1</sup> H NMR of diisopropylxanthogen disulfide in CDCl <sub>3</sub> . ....                                                                                                                                                                                                                                                                                            | 11 |
| <b>Figure S 8.</b> <sup>1</sup> H NMR of dimethyl 4,4'-(ethyne-1,2-diyl)dibenzoate in CDCl <sub>3</sub> . ....                                                                                                                                                                                                                                                                                 | 11 |
| <b>Figure S 9.</b> <sup>1</sup> H NMR of <b>2</b> in CDCl <sub>3</sub> . ....                                                                                                                                                                                                                                                                                                                  | 12 |
| <b>Figure S 10.</b> <sup>13</sup> C NMR of <b>2</b> in CDCl <sub>3</sub> . ....                                                                                                                                                                                                                                                                                                                | 12 |
| <b>Figure S 11.</b> <sup>1</sup> H NMR of <b>3</b> in CDCl <sub>3</sub> . ....                                                                                                                                                                                                                                                                                                                 | 13 |
| <b>Figure S 12.</b> <sup>13</sup> C NMR of <b>3</b> in CDCl <sub>3</sub> . ....                                                                                                                                                                                                                                                                                                                | 13 |
| <b>Figure S 13.</b> <sup>1</sup> H NMR of <b>1-Bu<sub>4</sub>(TBA)</b> in (CD <sub>3</sub> ) <sub>2</sub> CO. ....                                                                                                                                                                                                                                                                             | 14 |
| <b>Figure S 14.</b> <sup>13</sup> C NMR of <b>1-Bu<sub>4</sub>(TBA)</b> in (CD <sub>3</sub> ) <sub>2</sub> CO. ....                                                                                                                                                                                                                                                                            | 14 |
| <b>Figure S 15.</b> <sup>1</sup> H NMR of <b>1-H<sub>3</sub>(TBA)<sub>2</sub></b> in (CD <sub>3</sub> ) <sub>2</sub> SO. ....                                                                                                                                                                                                                                                                  | 15 |
| <b>Figure S 16.</b> <sup>13</sup> C NMR of <b>1-H<sub>3</sub>(TBA)<sub>2</sub></b> in (CD <sub>3</sub> ) <sub>2</sub> SO. ....                                                                                                                                                                                                                                                                 | 15 |
| <b>Figure S 17.</b> SOMO and SOMO-1 for an Au bis(dithiolene) complex as in <b>1-H<sub>4</sub></b> where the carboxylic groups have been replaced by hydrogens. The yellow/black/grey spheres are the Au/C/H atoms (S atoms are not seen). The blue/red lobes are the positive/negative contributions to the molecular orbital. ....                                                           | 16 |

### Equations

|                                                                                                                                       |   |
|---------------------------------------------------------------------------------------------------------------------------------------|---|
| <b>Equation S 1.</b> Analytical expression for the magnetic susceptibility of a regular 1D chain. ....                                | 5 |
| <b>Equation S 2.</b> Expression of the total magnetic susceptibility accounting for the presence of Curie-type magnetic defects. .... | 6 |

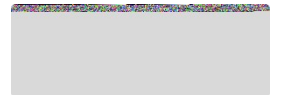

## Experimental Part

All reagents and chemicals commercially available were used without further purification. Solvents were dried using standard techniques. NMR spectra were recorded on a Bruker III 300 ( $^1\text{H}$ , 300 MHz ;  $^{13}\text{C}$ , 75 MHz). Chemical shifts are given in parts per million (ppm) relative to TMS and coupling  $J$  in Hertz (Hz). High resolution mass spectrometry (HRMS) was performed with Jeol JMS-S3000 SpiralTOF. Cyclic voltammetry was performed using a Biologic SP-150 potentiostat with positive feedback compensation. Tetrabutylammonium hexafluorophosphate (0.1 M as supporting electrolyte) was purchased from Sigma-Aldrich and recrystallized prior to use. Experiments were carried out in a one-compartment cell equipped with platinum working microelectrode ( $\text{Ø} = 2 \text{ mm}$ ) and a platinum wire counter electrode. A silver wire immersed in 0.01M  $\text{AgNO}_3$  acetonitrile solution was used as pseudo-reference electrode and checked against ferrocene/ferrocenium couple ( $\text{Fc}/\text{Fc}^+$ ) before and after each experiment. Single crystals of the compounds were mounted on glass fibre loops using a viscous hydrocarbon oil to coat the crystal and then transferred directly to cold nitrogen stream for data collection. Data collection were mostly performed on an Agilent Supernova with  $\text{CuK}\alpha$  radiation ( $\lambda = 1.54184 \text{ \AA}$ ). The structures were solved by intrinsic phasing and refined on  $\text{F}^2$  by full matrix least-squares techniques with SHELX programs (SHELXT 2018/2 and SHELXL 2018/3)<sup>1,2</sup> using the ShelXle and the Olex2 graphical user interfaces.<sup>3,4</sup> These data can be obtained free of charge from CCDC, 12 Union road, Cambridge CB2 1EZ, UK with the deposition numbers **2532706-2532708** (e-mail: [deposit@ccdc.cam.ac.uk](mailto:deposit@ccdc.cam.ac.uk) or <http://www.ccdc.cam.ac.uk/>).

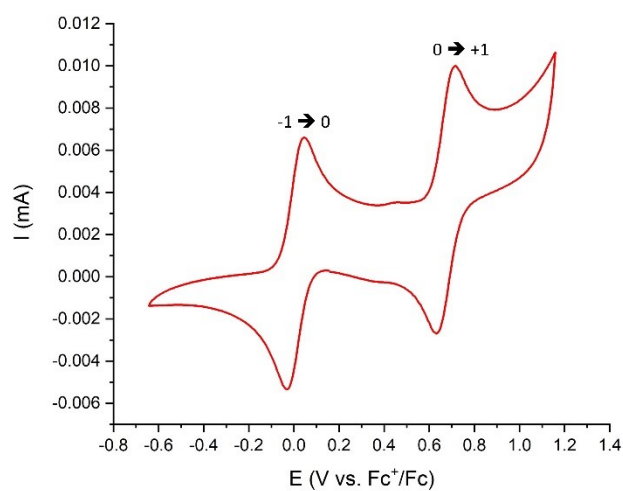

**Figure S 1.** Cyclic Voltammogram for **1-Bu<sub>4</sub>;TBA<sup>+</sup>** (DCM, C = 1·10<sup>-3</sup> mol.L<sup>-1</sup>, TBAPF<sub>6</sub> 0.1 M, Ar, WE and CE = Pt, RE = Ag<sup>+</sup>/Ag).

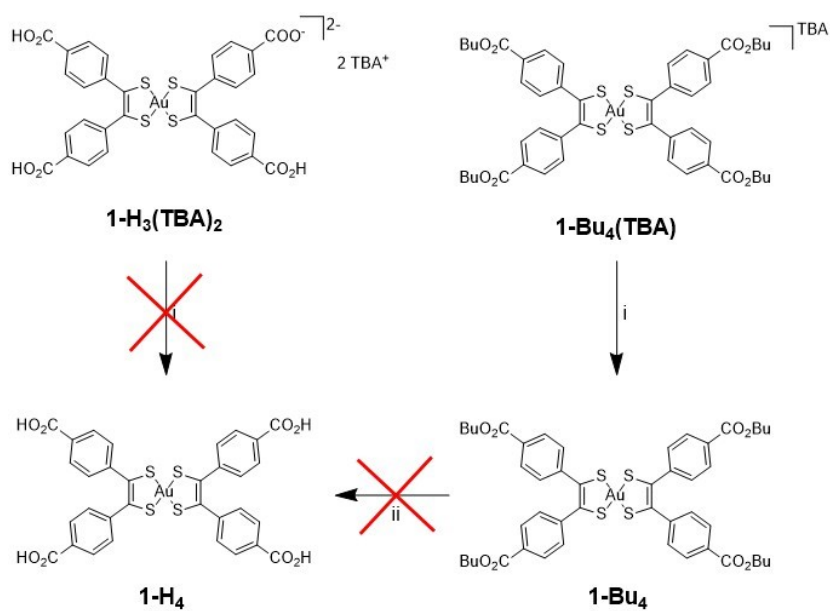

**Scheme S 1.** Synthetic trials to obtain the target neutral Au-dithiolene complexes **1-H<sub>4</sub>**. i) I<sub>2</sub>, CH<sub>2</sub>Cl<sub>2</sub>, ii) TBAOH, THF, H<sub>2</sub>O.

$$\chi_c = \frac{N_A g^2 \mu_B^2}{kT} \frac{0.25 + 0.14995x + 0.30094x^2}{1.0 + 1.9862x + 0.68854x^2 + 6.0626x^3}$$

$$x = \frac{|J|}{kT}$$

**Equation S 1.** Analytical expression for the magnetic susceptibility of a regular 1D chain.

$$\chi = \chi_c(1 - \rho) + \rho \frac{N_A g_i^2 \mu_B^2}{3kT} S(S + 1)$$

**Equation S 2.** Expression of the total magnetic susceptibility accounting for the presence of Curie-type magnetic defects.

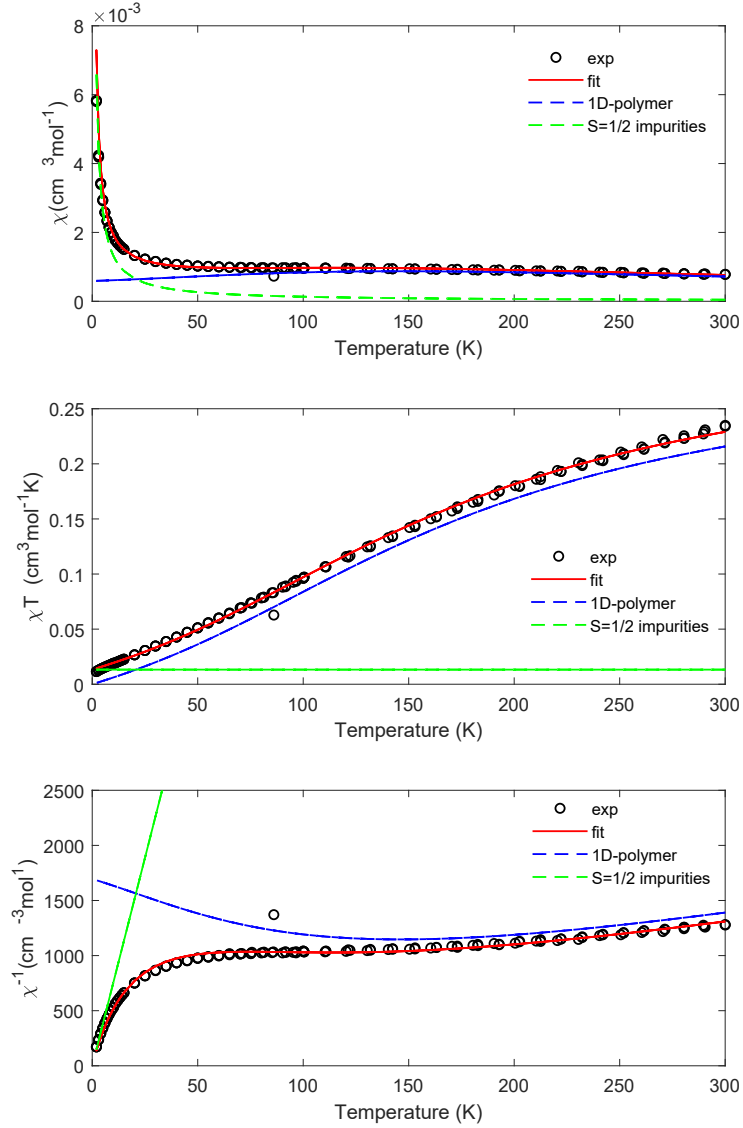

**Figure S 2.** Experimental magnetic data for **1-Cd<sub>2</sub>** (black circles) together with the best-fit curves (red lines) for the temperature dependence of  $\chi$ ,  $\chi T$ , and  $1/\chi$ . The blue line represents the contribution of the polymeric 1D chain, while the green line corresponds to the Curie-type contribution from isolated  $S = 1/2$  spins with  $g=2.0$ .

**Table S 1.** Crystallographic data, details of data collection and structure refinement parameters.

|                                                                                                                          | <b>1-Bu<sub>4</sub></b>                                                                 | <b>1-H<sub>3</sub>(TBA)<sub>2</sub></b>                                        | <b>1-Cd<sub>2</sub></b>                                                                                  |
|--------------------------------------------------------------------------------------------------------------------------|-----------------------------------------------------------------------------------------|--------------------------------------------------------------------------------|----------------------------------------------------------------------------------------------------------|
| Formula sum                                                                                                              | C <sub>48.50</sub> H <sub>52.50</sub> AuN <sub>0.25</sub> O <sub>8</sub> S <sub>4</sub> | C <sub>64</sub> H <sub>91</sub> AuN <sub>2</sub> O <sub>8</sub> S <sub>4</sub> | C <sub>34.25</sub> H <sub>23.25</sub> AuCd <sub>2</sub> N <sub>0.75</sub> O <sub>10</sub> S <sub>4</sub> |
| Formula weight                                                                                                           | 1092.11                                                                                 | 1341.59                                                                        | 1155.29                                                                                                  |
| Crystal system                                                                                                           | Triclinic                                                                               | Monoclinic                                                                     | Hexagonal                                                                                                |
| Space group                                                                                                              | <i>P</i> -1                                                                             | <i>P</i> 2 <sub>1</sub> / <i>c</i>                                             | <i>P</i> 6 <sub>5</sub>                                                                                  |
| <i>a</i> /Å                                                                                                              | 15.5973(3)                                                                              | 21.1317(3)                                                                     | 19.51040(10)                                                                                             |
| <i>b</i> /Å                                                                                                              | 25.2395(5)                                                                              | 9.43303(10)                                                                    | 19.51040(10)                                                                                             |
| <i>c</i> /Å                                                                                                              | 26.4393(5)                                                                              | 17.6654(2)                                                                     | 20.2619(2)                                                                                               |
| <i>α</i> /°                                                                                                              | 104.210(2)                                                                              | 90                                                                             | 90                                                                                                       |
| <i>β</i> /°                                                                                                              | 94.801(2)                                                                               | 111.9150(14)                                                                   | 90                                                                                                       |
| <i>γ</i> /°                                                                                                              | 101.498(2)                                                                              | 90                                                                             | 120                                                                                                      |
| <i>V</i> /Å <sup>3</sup>                                                                                                 | 9790.5(3)                                                                               | 3266.89(7)                                                                     | 6679.49(10)                                                                                              |
| <i>Z</i> / <i>Z</i> '                                                                                                    | 2 / 4                                                                                   | 4 / 0.5                                                                        | 6 / 1                                                                                                    |
| <i>D<sub>c</sub></i> /g cm <sup>-3</sup>                                                                                 | 1.482                                                                                   | 1.364                                                                          | 1.723                                                                                                    |
| T/K                                                                                                                      | 200.00(10)                                                                              | 293.0(9)                                                                       | 295.4(3)                                                                                                 |
| <i>μ</i> /mm <sup>-1</sup>                                                                                               | 7.652                                                                                   | 5.839                                                                          | 15.814                                                                                                   |
| Reflections (total)                                                                                                      | 37746                                                                                   | 5844                                                                           | 9299                                                                                                     |
| final <i>R<sub>f</sub></i> <sup><i>a</i></sup> , <i>wR</i> <sub>2</sub> <sup><i>b</i></sup> [ <i>I</i> > 2σ( <i>I</i> )] | 0.0955/0.2552                                                                           | 0.0659/0.1588                                                                  | 0.0298/0.0777                                                                                            |
| <i>R<sub>f</sub></i> <sup><i>a</i></sup> , <i>wR</i> <sub>2</sub> <sup><i>b</i></sup> (all data)                         | 0.1139/0.2764                                                                           | 0.0686/0.1649                                                                  | 0.0319/0.0797                                                                                            |
| goodness-of-fit on <i>F</i> <sup>2</sup>                                                                                 | 1.042                                                                                   | 1.066                                                                          | 1.049                                                                                                    |
| Δ <i>ρ</i> <sub>min</sub> /Δ <i>ρ</i> <sub>max</sub> (e Å <sup>-3</sup> )                                                | -2.360/3.186                                                                            | -2.130/3.243                                                                   | -0.838/0.869                                                                                             |
| Completeness (%)                                                                                                         | 99.9                                                                                    | 98.4                                                                           | 99.6                                                                                                     |
| Flack (Parsons)                                                                                                          | -                                                                                       | -                                                                              | -0.023(5)                                                                                                |
| CCDC number                                                                                                              | 2532708                                                                                 | 2532707                                                                        | 2532706                                                                                                  |

| Atom 1 | Atom 2 | Length (Å) | Atom 1 | Atom 2 | Length (Å) |
|--------|--------|------------|--------|--------|------------|
| Au1A   | S4A    | 2.295(3)   | Au1B   | S3B    | 2.305(3)   |
| Au1A   | S1A    | 2.283(3)   | Au1B   | S4B    | 2.285(2)   |
| Au1A   | S2A    | 2.296(3)   | Au1B   | S1B    | 2.295(3)   |
| Au1A   | S3A    | 2.291(3)   | Au1B   | S2B    | 2.289(2)   |
| S1A    | C13A   | 1.72(1)    | S2B    | C25B   | 1.74(1)    |
| S2A    | C14A   | 1.75(1)    | S1B    | C24B   | 1.73(1)    |
| S4A    | C37A   | 1.76(1)    | S4B    | C12B   | 1.71(1)    |
| S3A    | C38A   | 1.75(1)    | S3B    | C13B   | 1.72(1)    |
| C13A   | C14A   | 1.35(2)    | C13B   | C12B   | 1.39(2)    |
| C37A   | C38A   | 1.37(2)    | C24B   | C25B   | 1.36(2)    |
| Atom 1 | Atom 2 | Length (Å) | Atom 1 | Atom 2 | Length (Å) |
| Au1C   | S3C    | 2.283(2)   | Au1D   | S2D    | 2.301(3)   |
| Au1C   | S4C    | 2.303(3)   | Au1D   | S3D    | 2.284(3)   |
| Au1C   | S1C    | 2.285(2)   | Au1D   | S4D    | 2.299(3)   |
| Au1C   | S2C    | 2.297(3)   | Au1D   | S1D    | 2.295(3)   |
| S2C    | C26C   | 1.78(1)    | S1D    | C11D   | 1.73(1)    |
| S1C    | C25C   | 1.73(1)    | S2D    | C12D   | 1.74(1)    |
| S4C    | C12C   | 1.78(1)    | S4D    | C34D   | 1.74(1)    |
| S3C    | C13C   | 1.73(1)    | S3D    | C35D   | 1.71(1)    |
| C12C   | C13C   | 1.37(2)    | C11D   | C12D   | 1.35(2)    |
| C25C   | C26C   | 1.38(1)    | C34D   | C35D   | 1.40(2)    |

**Table S 2.** Selected bond lengths for **1-Bu<sub>4</sub>**.

| Atom 1 | Atom 2 | Length (Å) |
|--------|--------|------------|
| Au1    | S2     | 2.316      |
| Au1    | S1     | 2.303      |
| S1     | C13    | 1.769(4)   |
| S2     | C19    | 1.768(4)   |
| C13    | C19    | 1.347(6)   |

**Table S 3.** Selected bond lengths for **1-H<sub>3</sub>(TBA)<sub>2</sub>**.

| Atom 1 | Atom 2 | Length (Å) |
|--------|--------|------------|
| Au2    | S1     | 2.277(2)   |
| Au2    | S2     | 2.279(2)   |
| Au2    | S3     | 2.282(2)   |
| Au2    | S4     | 2.281(2)   |
| S4     | C25    | 1.723(9)   |
| S3     | C26    | 1.738(9)   |
| S1     | C8     | 1.724(7)   |
| S2     | C9     | 1.740(9)   |
| C8     | C9     | 1.36(2)    |
| C26    | C25    | 1.36(2)    |

**Table S 4.** Selected bond lengths for **1-Cd<sub>2</sub>**.

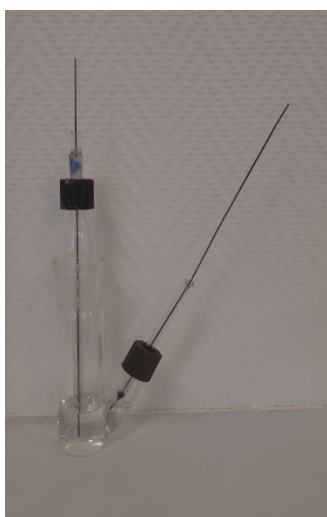

**Figure S 3.** Set-up used for the electrocrystallization of **1-Cd<sub>2</sub>**.

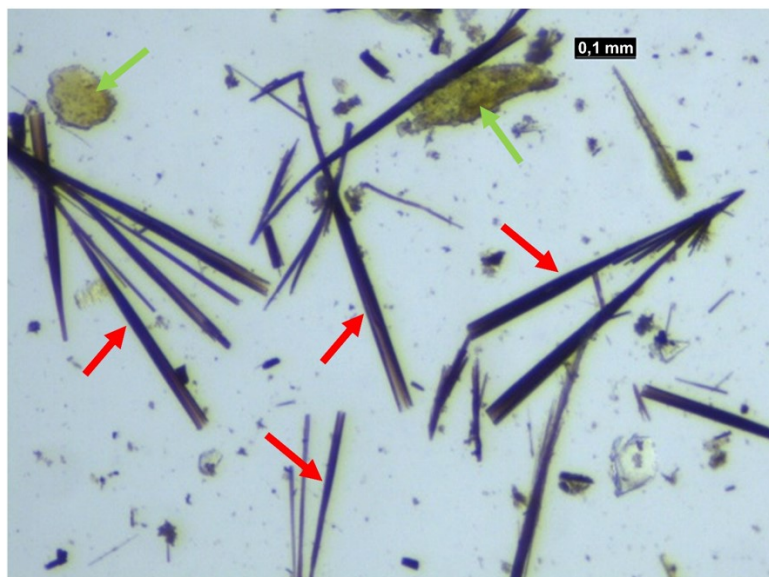

**Figure S 4.** Microscope picture of the crystals obtained from the solvothermal electrocrystallization of  $1\text{-Cd}_2$  (red arrows : crystalline dark needles of  $1\text{-Cd}_2$  ; red arrows ; yellow  $1\text{-Cd}_2(\text{TBA})$  : green arrows).

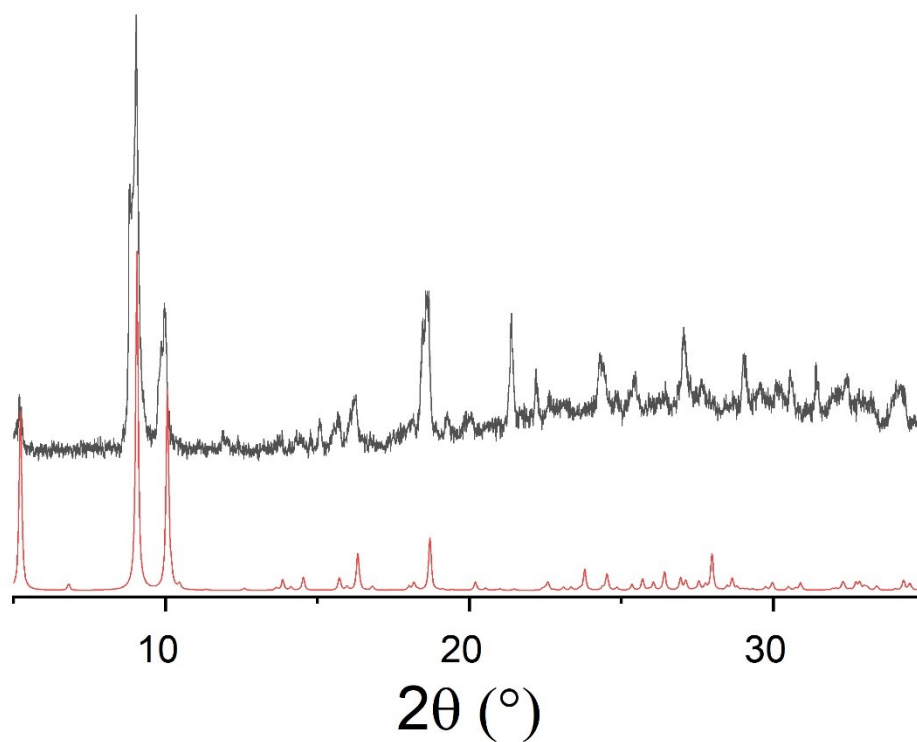

**Figure S 5.** Powder X-Ray Diffractogram of  $1\text{-Cd}_2$  (red : simulated ; black : experimental).

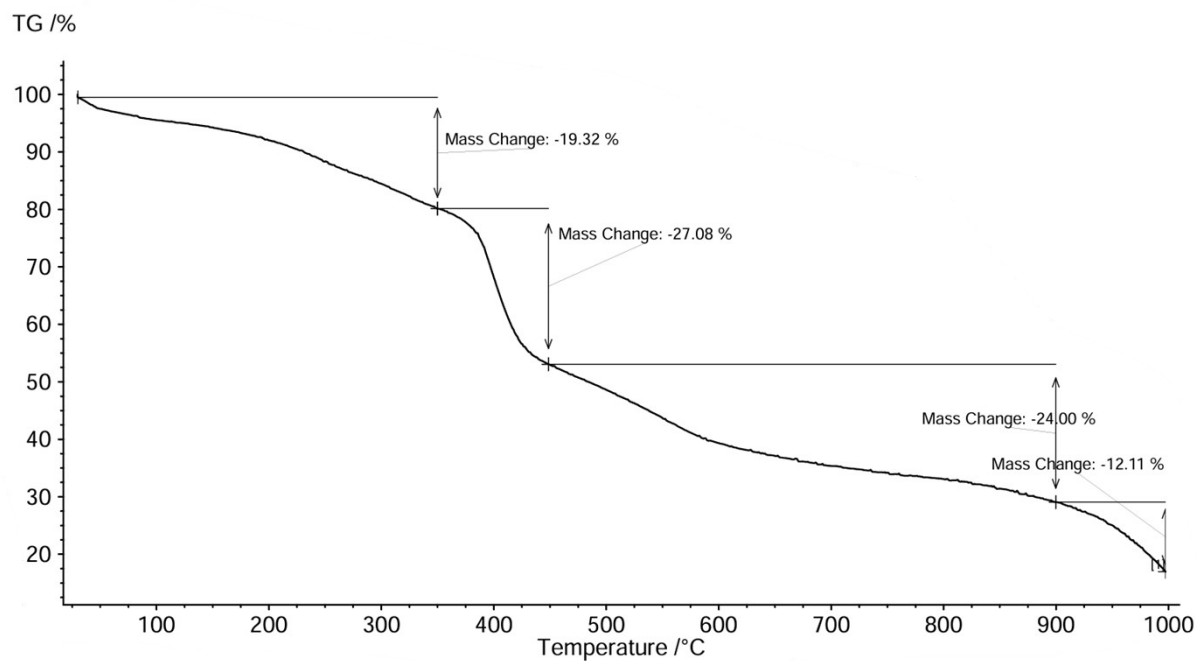

**Figure S 6.** TGA of **1-Cd<sub>2</sub>** (Argon flow, 10 K/min scan-rate). The loss of the solvent (DMF, EtOH, acetone or water) is observed until 330°C. The material is degraded above 350°C. At 900°C, the remaining mass corresponds to the inorganic parts.

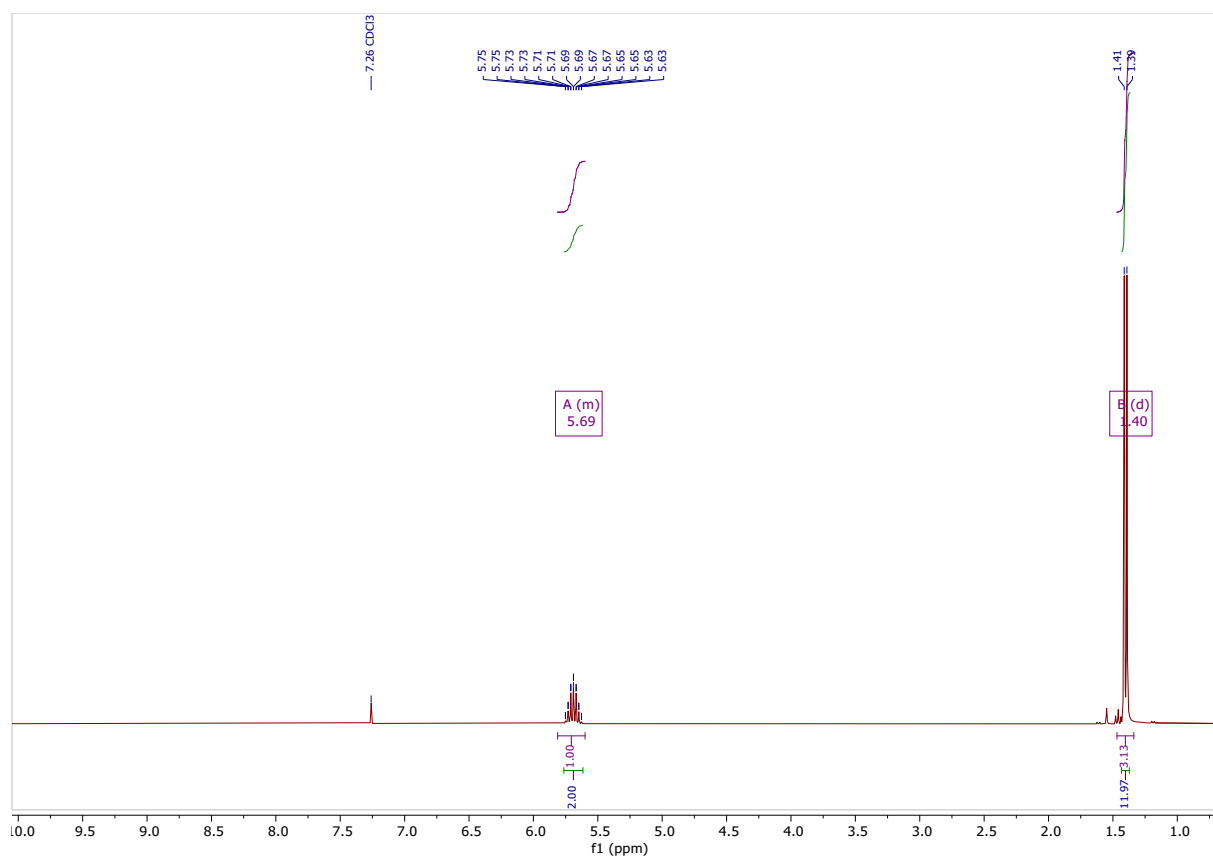

Figure S 7.  $^1\text{H}$  NMR of diisopropylxanthogen disulfide in  $\text{CDCl}_3$ .

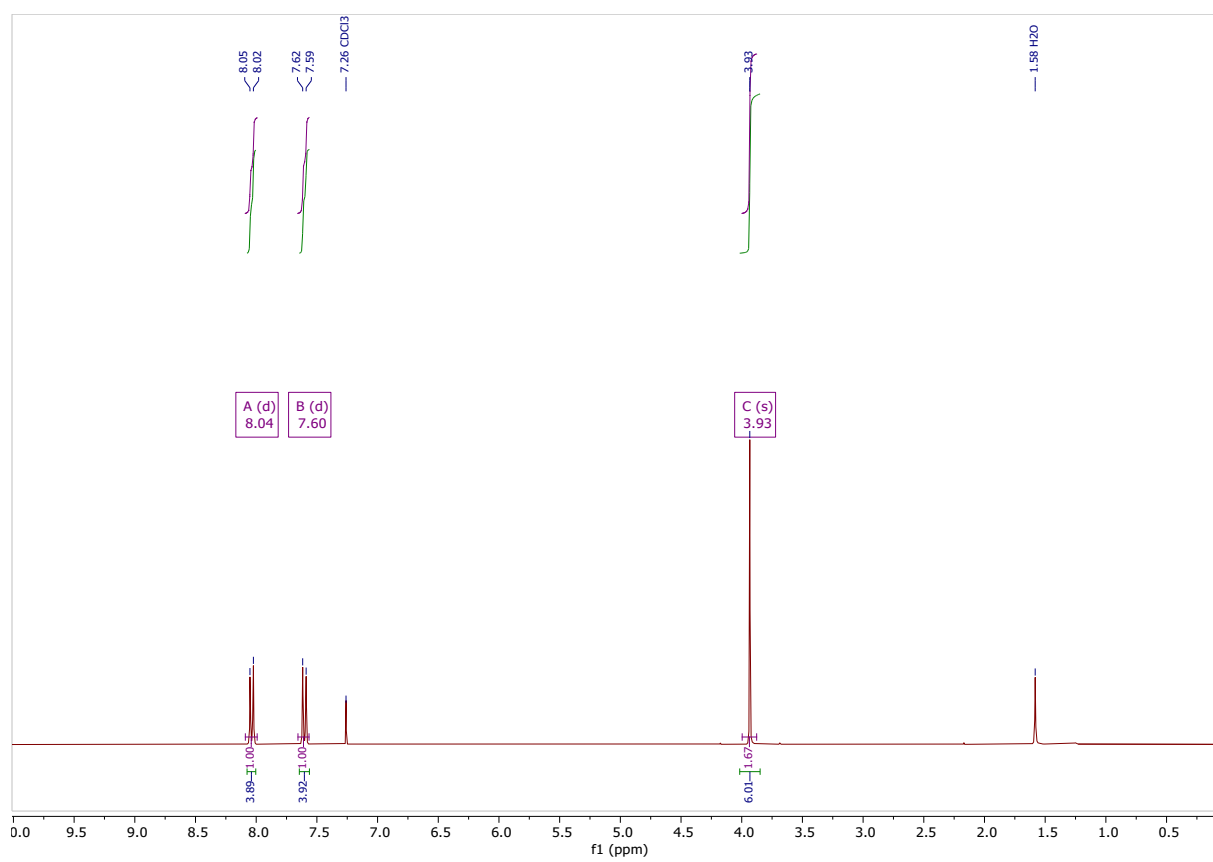

Figure S 8.  $^1\text{H}$  NMR of dimethyl 4,4'-(ethyne-1,2-diyl)dibenzoate in  $\text{CDCl}_3$ .

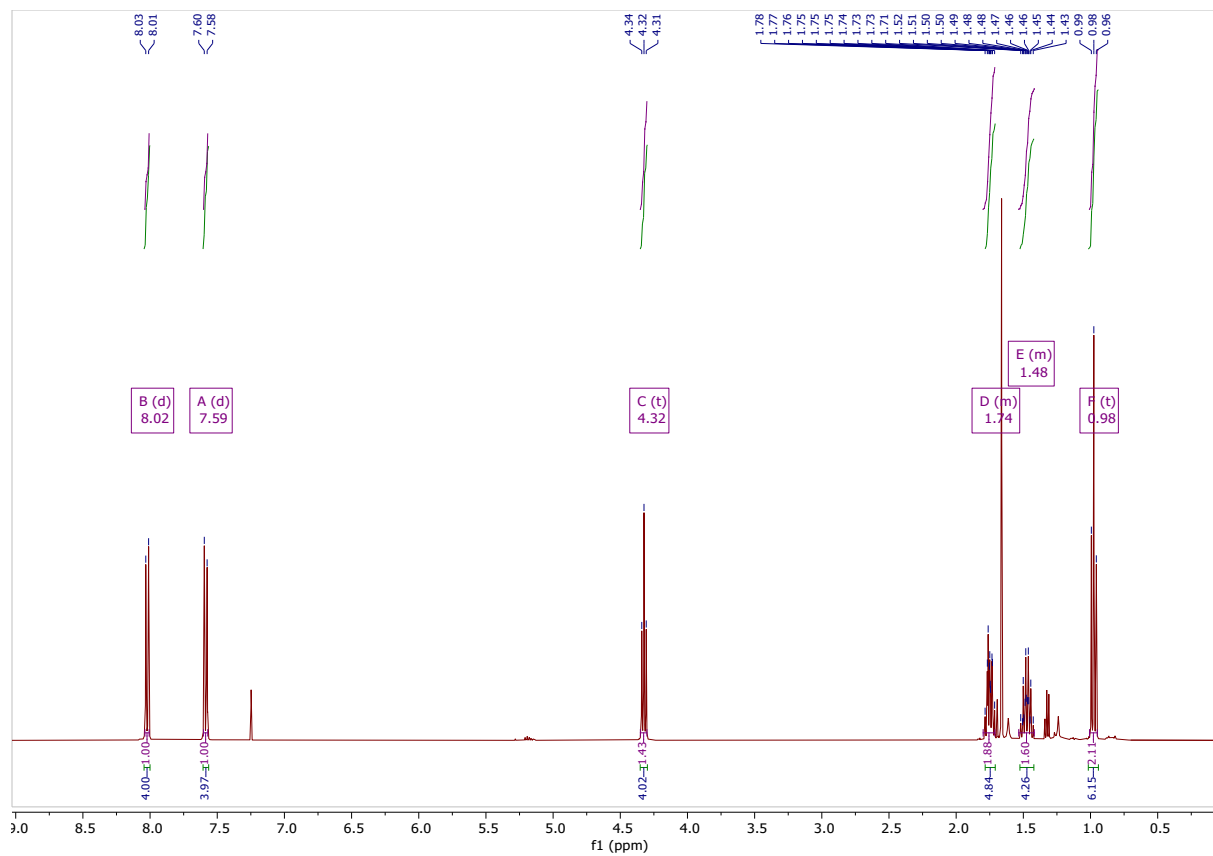

Figure S 9.  $^1\text{H}$  NMR of **2** in  $\text{CDCl}_3$ .

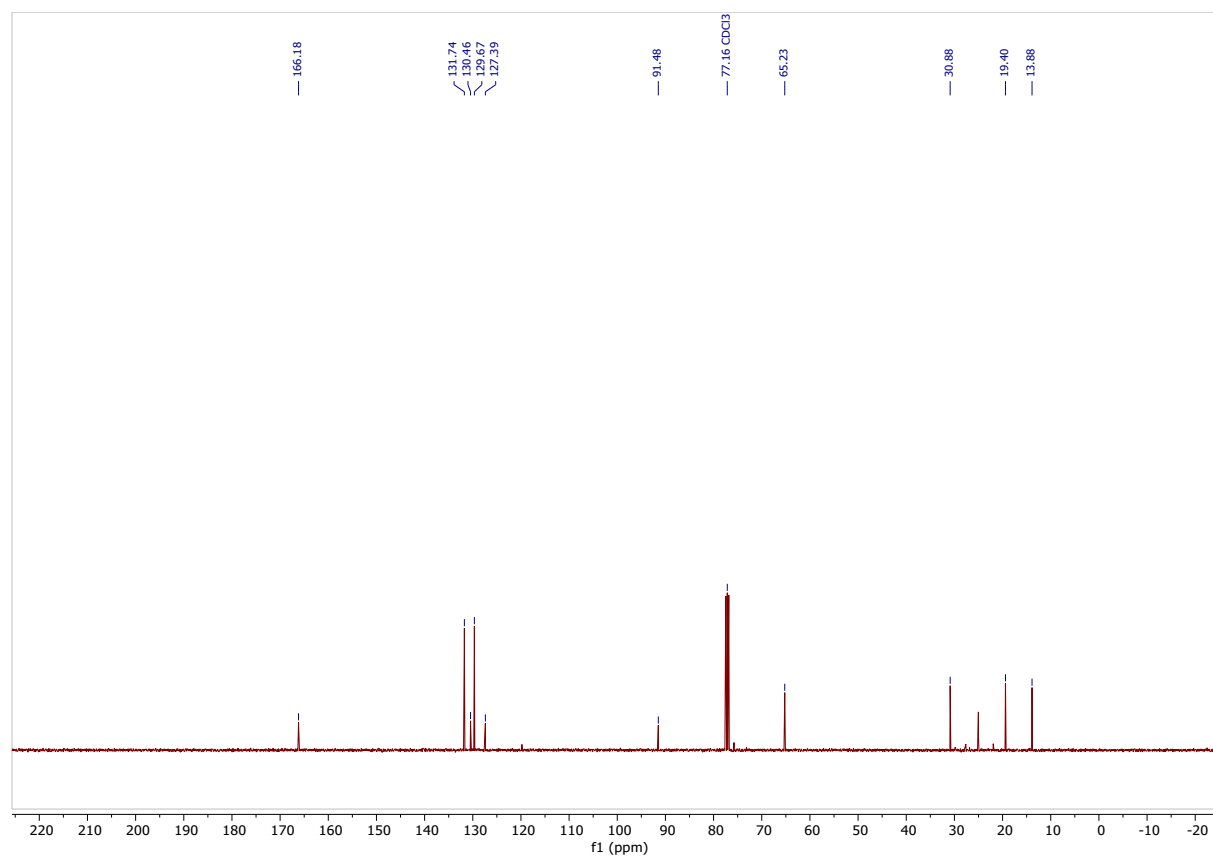

Figure S 10.  $^{13}\text{C}$  NMR of **2** in  $\text{CDCl}_3$ .

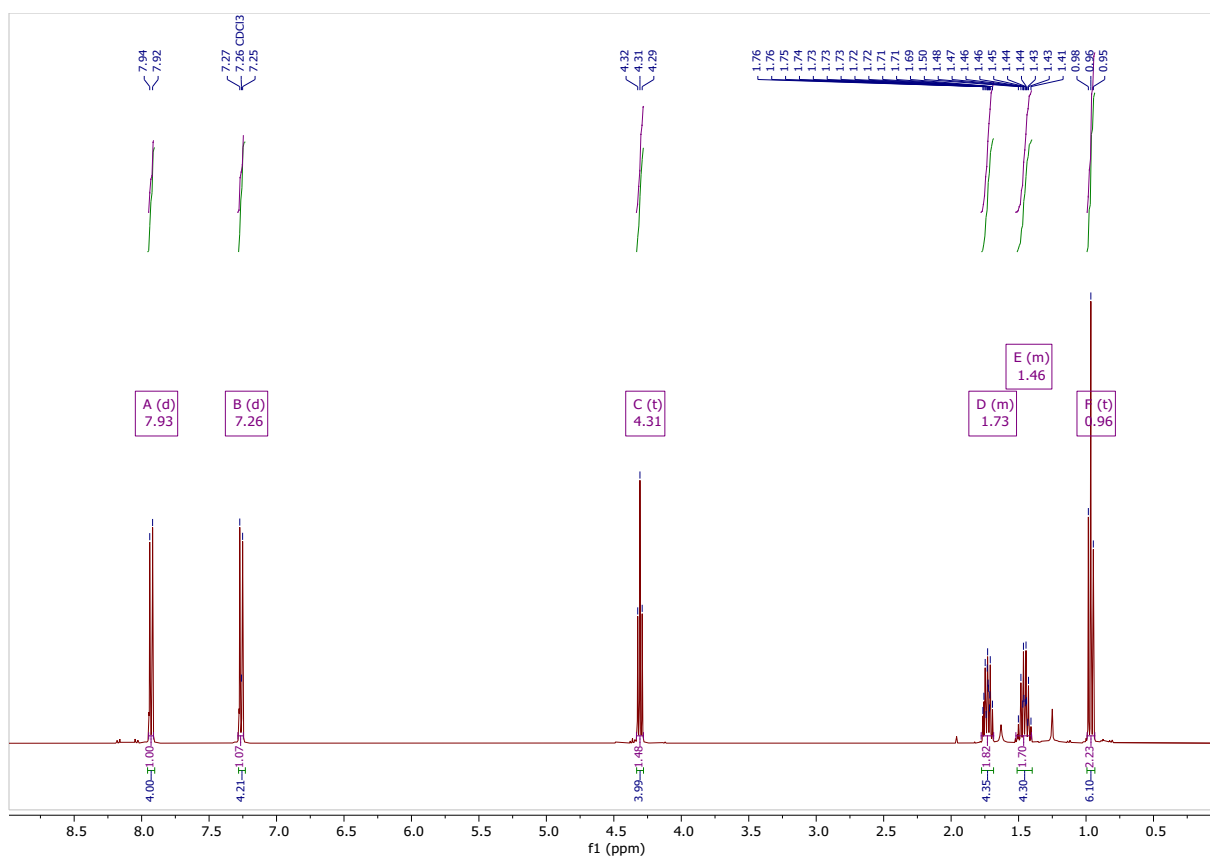

Figure S 11.  $^1\text{H}$  NMR of **3** in  $\text{CDCl}_3$ .

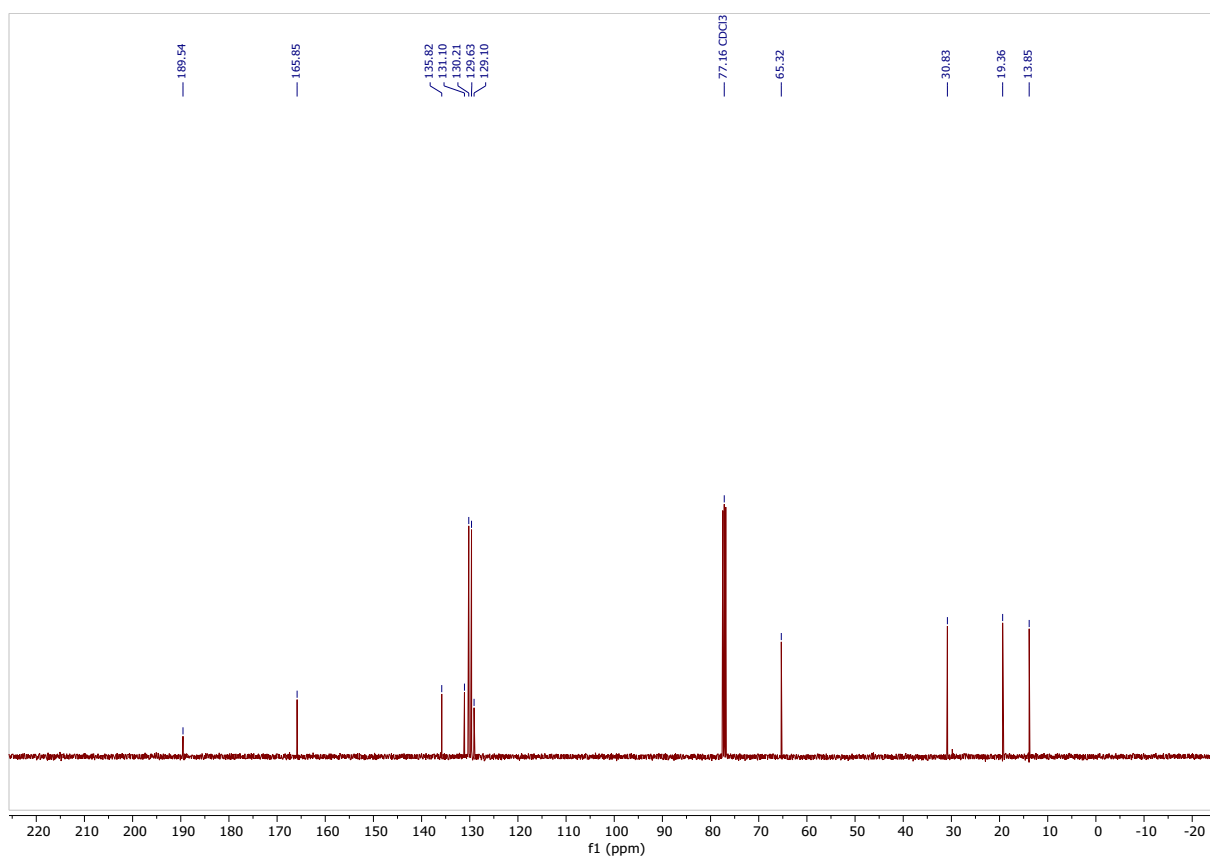

Figure S 12.  $^{13}\text{C}$  NMR of **3** in  $\text{CDCl}_3$ .

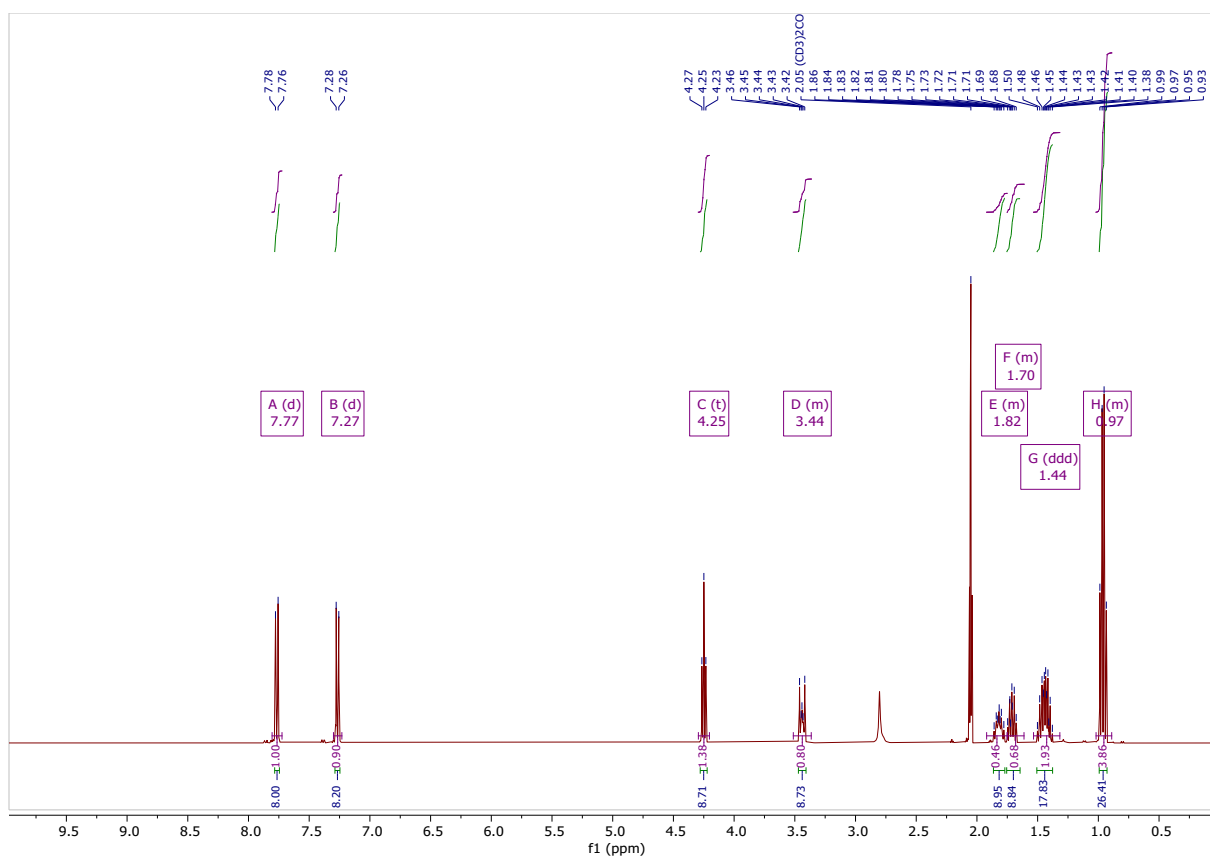

Figure S 13.  $^1\text{H}$  NMR of 1-Bu<sub>4</sub>(TBA) in  $(\text{CD}_3)_2\text{CO}$ .

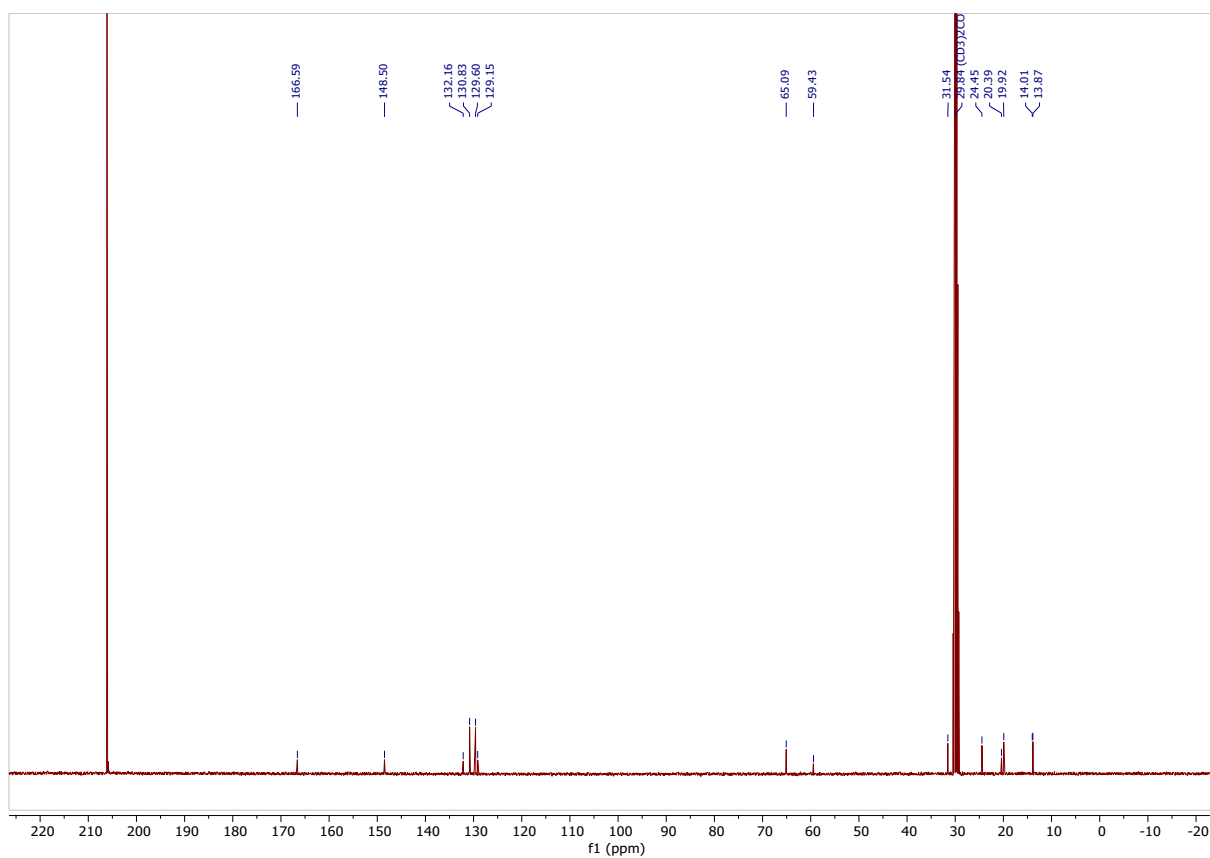

Figure S 14.  $^{13}\text{C}$  NMR of 1-Bu<sub>4</sub>(TBA) in  $(\text{CD}_3)_2\text{CO}$ .

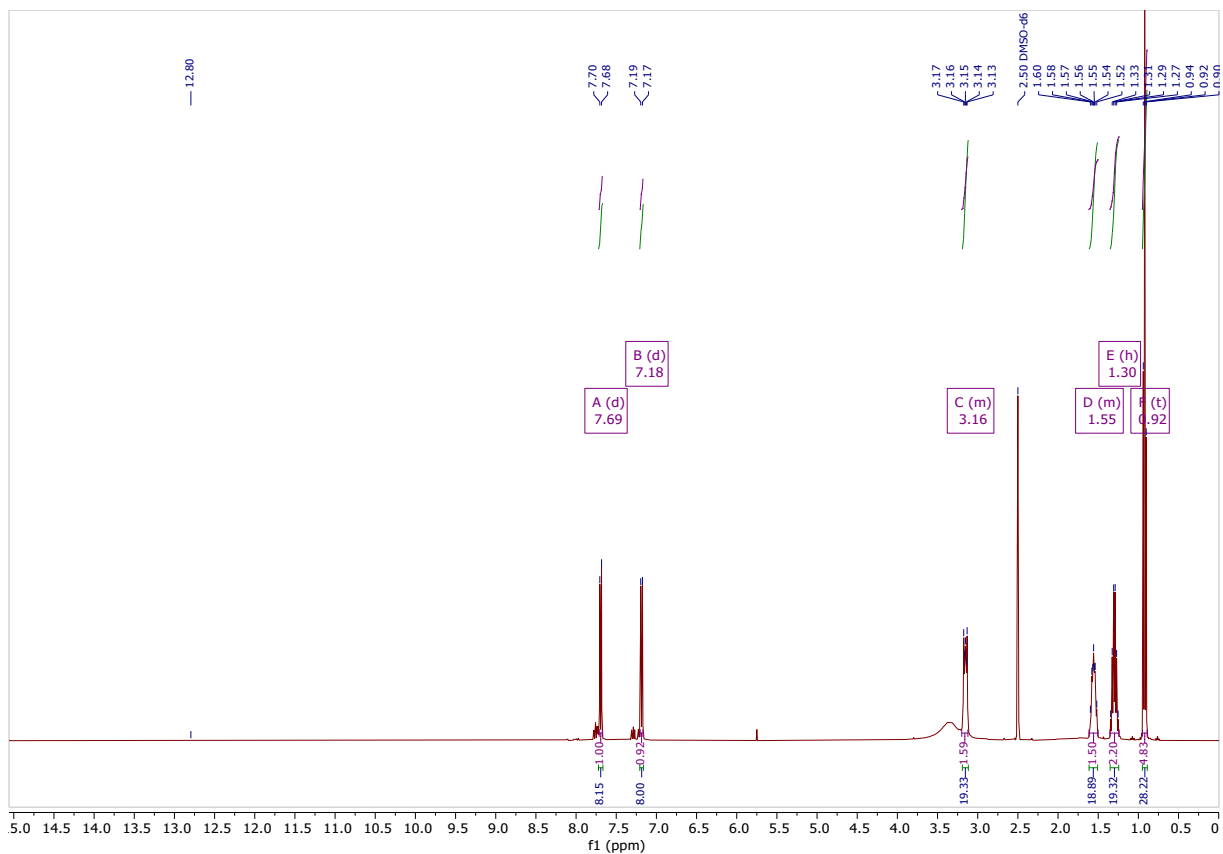

Figure S 15.  $^1\text{H}$  NMR of  $1\text{-H}_3(\text{TBA})_2$  in  $(\text{CD}_3)_2\text{SO}$ .

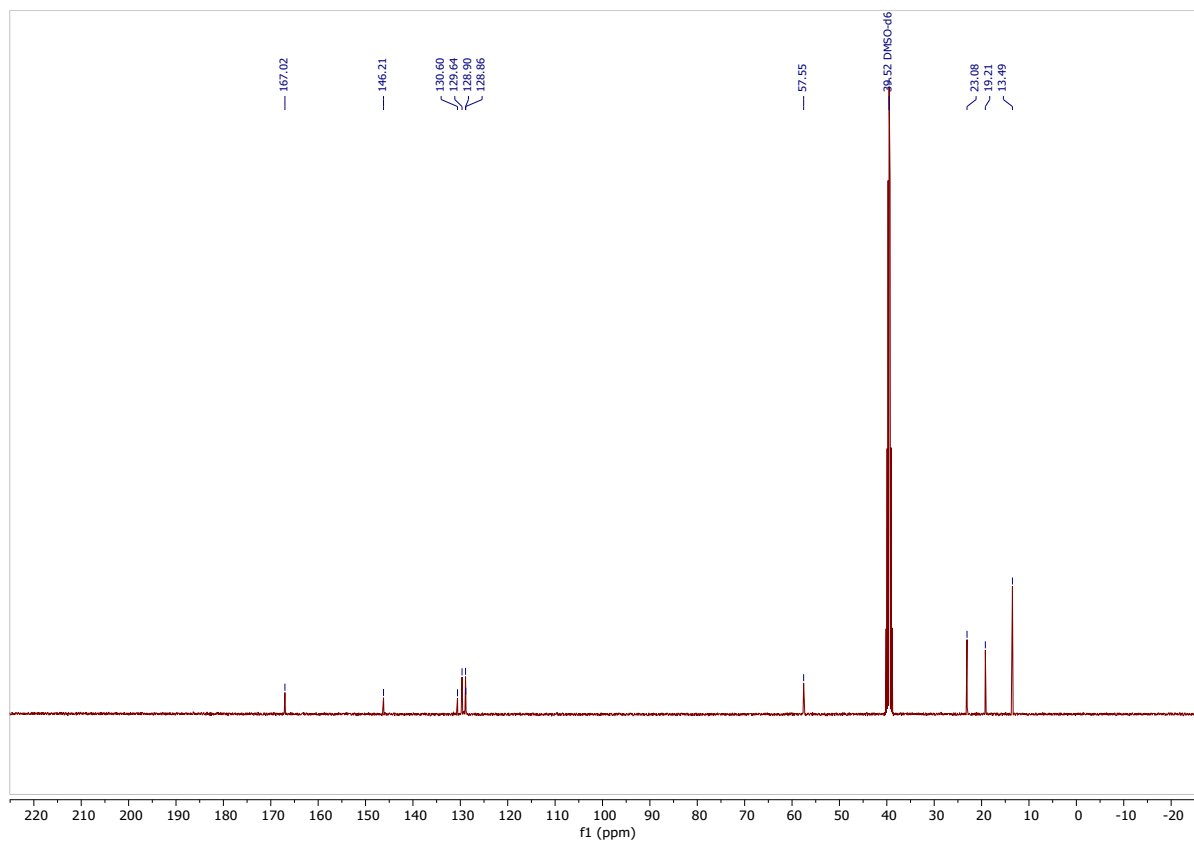

Figure S 16.  $^{13}\text{C}$  NMR of  $1\text{-H}_3(\text{TBA})_2$  in  $(\text{CD}_3)_2\text{SO}$ .

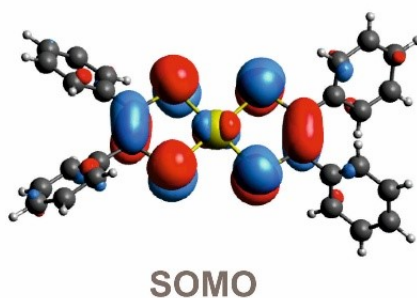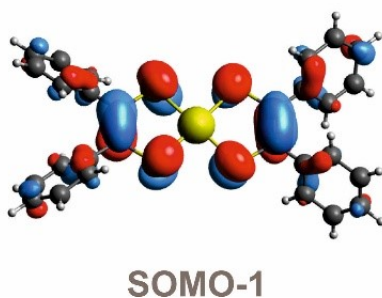

**Figure S 17.** SOMO and SOMO-1 for an Au bis(dithiolene) complex as in **1-H<sub>4</sub>** where the carboxylic groups have been replaced by hydrogens. The yellow/black/grey spheres are the Au/C/H atoms (S atoms are not seen). The blue/red lobes are the positive/negative contributions to the molecular orbital.

## Acknowledgements

This work was supported in France by the CNRS and the University of Angers. This work received financial support under the EUR LUMOMAT project and the Investments for the Future program ANR-18-EURE-0012 (support to Y.C. - MADCAP project). Work in Spain was supported by MCIN/AEI/10.13039/501100011033 and AEI through Grants PID2022-139776NB-C61 and PID2024-157317NB-I00 and by Generalitat de Catalunya (2021SGR01519 and 2021SGR00286). E.C. acknowledges MCIN/AEI/10.13039/501100011033 and AEI for support through the Severo Ochoa MATRANS42 (CEX2023-0001263-S) Excellence Centre distinction. P. A. acknowledges MCIN/AEI/10.13039/501100011033 and AEI for support through the Maria de Maeztu Units of Excellence Program (CEX-2021-001202-M). A CC-BY public copyright license has been applied by the authors to the present document and will be applied to all subsequent versions up to the Author Accepted Manuscript arising from this submission, in accordance with the grant's open access conditions (<https://creativecommons.org/licenses/by/4.0>).



## References

- 1 G. M. Sheldrick, *Acta Crystallogr. A*, 2008, **64**, 112–122.
- 2 G. M. Sheldrick, *Acta Crystallogr. A*, 2015, **71**, 3–8.
- 3 C. B. Hübschle, G. M. Sheldrick and B. Dittrich, *J. Appl. Cryst.*, 2011, **44**, 1281–1284.
- 4 O. V. Dolomanov, L. J. Bourhis, R. J. Gildea, J. a. K. Howard and H. Puschmann, *J. Appl. Cryst.*, 2009, **42**, 339–341.
